# Supplementary material for: Reduced circulating levels of chemokine CXCL14 in adolescent girls with polycystic ovary syndrome: normalization after insulin sensitization
Source: PubMed Central journal article supplement — BMJ Open Diabetes Res Care. 2020 Feb 26;8(1):e001035. doi: 10.1136/bmjdrc-2019-001035 (PMC7206903; doi:10.1136/bmjdrc-2019-001035), 2020-02-26
Supplement: bmjdrc-2019-001035supp002.pdf [file bmjdrc-2019-001035supp002.pdf]

**Supplemental Table 1.** Study variables in healthy control girls (N= 21) and in girls with Polycystic Ovary Syndrome (PCOS, N= 52).

|                                            | Controls<br>(N= 21) | PCOS<br>(N= 52) | P value |
|--------------------------------------------|---------------------|-----------------|---------|
| <b>Auxology</b>                            |                     |                 |         |
| Age (years)                                | 16.0 ± 1.4          | 15.6 ± 1.3      | -       |
| Birth weight Z-score                       | 0.2 ± 0.8           | -0.6 ± 1.0      | 0.03    |
| BMI (kg/m <sup>2</sup> )                   | 21.5 ± 2.8          | 24.3 ± 4.0      | 0.003   |
| BMI Z-score                                | 0.1 ± 1.0           | 0.9 ± 1.2       | 0.02    |
| Δ Z-score birth weight – BMI               | -0.2 ± 1.1          | 1.4 ± 1.5       | 0.02    |
| <b>Endocrine-Metabolic variables</b>       |                     |                 |         |
| Testosterone (nmol/ L)                     | 1.0 ± 0.4           | 1.3 ± 0.4       | 0.04    |
| SHBG (nmol/ L) †                           | 61.1 ± 26.5         | 30.9 ± 12.5     | <0.0001 |
| FAI †                                      | 1.8 ± 0.9           | 4.8 ± 2.5       | 0.0004  |
| Glucose (mmol/ L)                          | 4.9 ± 0.4           | 4.6 ± 0.4       | 0.004   |
| Fasting insulin (pmol/ L)                  | 50.2 ± 28.1         | 74.5 ± 42.4     | NS      |
| HOMA-IR                                    | 1.6 ± 0.9           | 2.3 ± 1.4       | NS      |
| HDL-cholesterol (nmol/ L)                  | 1.4 ± 0.2           | 1.3 ± 0.2       | NS      |
| LDL-cholesterol (nmol/ L)                  | 2.2 ± 0.5           | 2.3 ± 0.5       | NS      |
| Triglycerides (nmol/ L)                    | 0.6 ± 0.1           | 0.7 ± 0.3       | NS      |
| HMW adiponectin (mg/ L)                    | 9.1 ± 4.9           | 6.3 ± 4.7       | NS      |
| usCRP (mg/ L) †                            | 0.6 ± 0.5           | 1.5 ± 1.8       | NS      |
| <b>Body composition (DXA) ‡</b>            |                     |                 |         |
| Bone mineral density (g/ cm <sup>2</sup> ) | -                   | 1.18 ± 0.10     | -       |
| Lean mass (kg)                             | -                   | 35.9 ± 4.9      | -       |
| Fat mass (kg)                              | -                   | 22.9 ± 8.6      | -       |
| Abdominal fat (kg)                         | -                   | 6.1 ± 2.1       | -       |
| <b>Abdominal fat partitioning (MRI) †</b>  |                     |                 |         |
| Subcutaneous fat (cm <sup>2</sup> )        | 95 ± 52             | 184 ± 119       | NS      |
| Visceral fat (cm <sup>2</sup> )            | 27 ± 7              | 42 ± 20         | NS      |
| Hepatic fat (%)                            | 10 ± 6              | 18 ± 6          | 0.001   |
| Central (hepato-visceral) fat              | 37 ± 11             | 60 ± 22         | 0.01    |

Values are mean ± standard deviation.

BMI, body mass index; SHBG, sex hormone-binding globulin; FAI, free androgen index; HOMA-IR, homeostasis model assessment insulin resistance; HDL, high-density lipoprotein; LDL, low-density lipoprotein; HMW, high molecular weight; usCRP, ultra-sensitive C-reactive protein; DXA, dual X-ray absorptiometry; MRI, magnetic resonance imaging; NS: not significant.

†SHBG, FAI, usCRP and abdominal fat partitioning assessments were performed in 15 out of 21 healthy adolescent girls.

‡ Indicative DXA values in healthy adolescents, matched for age and height (n=41): lean mass 35.1 ± 1.0 kg; fat mass 17.6 ± 1.4 kg (Ibáñez L, et al. *J Adolesc Health* 2017; 61: 446-453).

P values are adjusted for age and BMI.
