# Supplementary material for: Reduced circulating levels of chemokine CXCL14 in adolescent girls with polycystic ovary syndrome: normalization after insulin sensitization
Source: PubMed Central journal article supplement — BMJ Open Diabetes Res Care. 2020 Feb 26;8(1):e001035. doi: 10.1136/bmjdrc-2019-001035 (PMC7206903; doi:10.1136/bmjdrc-2019-001035), 2020-02-26
Supplement: bmjdrc-2019-001035supp003.pdf [file bmjdrc-2019-001035supp003.pdf]

**Supplemental Table 2.** Correlations between circulating baseline CXCL14 concentrations and selected variables in the study population [N= 21 controls and N= 52 girls with Polycystic Ovary Syndrome (PCOS)].

| All subjects (N= 73)                      |                 |              |
|-------------------------------------------|-----------------|--------------|
|                                           | CXCL14 (ng/ mL) |              |
|                                           | R               | P            |
| <b>Auxological variables</b>              |                 |              |
| Age (yr)                                  | -0.130          | 0.273        |
| Birth weight Z-score                      | 0.035           | 0.768        |
| BMI (kg/m <sup>2</sup> )                  | -0.157          | 0.185        |
| BMI Z-score                               | -0.137          | 0.247        |
| Δ Z-score birth weight – BMI              | -0.124          | 0.299        |
| <b>Endocrine-Metabolic variables</b>      |                 |              |
| Testosterone (nmol/ L)                    | -0.023          | 0.854        |
| SHBG (nmol/ L) †                          | 0.039           | 0.756        |
| FAI †                                     | -0.099          | 0.441        |
| Glucose (mmol/ L)                         | 0.224           | 0.058        |
| Fasting insulin (pmol/ L)                 | -0.102          | 0.392        |
| HOMA-IR                                   | -0.083          | 0.485        |
| HDL-cholesterol (nmol/ L)                 | 0.039           | 0.740        |
| LDL-cholesterol (nmol/ L)                 | 0.058           | 0.627        |
| Triglycerides (nmol/ L)                   | -0.125          | 0.290        |
| HMW adiponectin (mg/ L)                   | <b>0.275</b>    | <b>0.023</b> |
| usCRP (mg/ L) †                           | -0.195          | 0.115        |
| <b>Abdominal fat partitioning (MRI) †</b> |                 |              |
| Subcutaneous fat (cm <sup>2</sup> )       | -0.158          | 0.202        |
| Visceral fat (cm <sup>2</sup> )           | 0.025           | 0.844        |
| Hepatic fat (%)                           | -0.238          | 0.052        |
| Central (hepato-visceral) fat             | -0.049          | 0.692        |

CXCL14, C-X-C motif chemokine ligand-14, BMI, body mass index; SHBG, sex hormone-binding globulin; FAI, free androgen index; HOMA-IR, homeostasis model assessment insulin resistance; HDL, high-density lipoprotein; LDL, low-density lipoprotein; HMW, high molecular weight; usCRP, ultra-sensitive C-reactive protein; DXA, dual X-ray absorptiometry; MRI, magnetic resonance imaging.

† SHBG, FAI, usCRP and abdominal fat partitioning assessments were performed in 67 subjects (15 control girls and 52 girls with PCOS).

Results are Pearson correlation coefficients and P values.
