# Supplementary material for: Reduced circulating levels of chemokine CXCL14 in adolescent girls with polycystic ovary syndrome: normalization after insulin sensitization
Source: PubMed Central journal article supplement — BMJ Open Diabetes Res Care. 2020 Feb 26;8(1):e001035. doi: 10.1136/bmjdrc-2019-001035 (PMC7206903; doi:10.1136/bmjdrc-2019-001035), 2020-02-26
Supplement: bmjdrc-2019-001035supp004.pdf [file bmjdrc-2019-001035supp004.pdf]

**Supplemental Table 3.** Auxological, endocrine-metabolic, body composition (by DXA), and abdominal fat partitioning (by MRI) assessments in adolescent girls with PCOS who were randomized to receive oral contraception (OC, N=16) or a low-dose combination of Spironolactone (50mg/d), Pioglitazone (7.5 mg/d) and Metformin (850 mg/d) (SPIOMET, N=15) for 1 year.

|                                           | OC <sup>†</sup> (N= 16) |            |                   | SPIOMET (N= 15)    |            |                   | P value |
|-------------------------------------------|-------------------------|------------|-------------------|--------------------|------------|-------------------|---------|
|                                           | Start <sup>‡</sup>      | 1 year     | $\Delta$ 0-1 year | Start <sup>‡</sup> | 1 year     | $\Delta$ 0-1 year |         |
| <b>Auxology</b>                           |                         |            |                   |                    |            |                   |         |
| Age (years)                               | 15.8 ± 1.4              | 16.9 ± 1.5 | -                 | 15.5 ± 1.4         | 16.6 ± 1.4 | -                 | -       |
| Birth weight Z-score                      | -0.5 ± 1.0              | -          | -                 | -0.2 ± 1.1         | -          | -                 | -       |
| BMI (kg/m <sup>2</sup> )                  | 25 ± 4                  | 26 ± 4     | 1.2 ± 1.4         | 25 ± 5             | 25 ± 5     | 0.0 ± 2.4         | NS      |
| BMI Z-score                               | 0.9 ± 1.2               | 1.3 ± 1.4  | 0.4 ± 0.5         | 1.1 ± 1.4          | 1.1 ± 1.5  | -0.1 ± 0.7        | NS      |
| $\Delta$ Z-score birth weight – BMI       | 1.4 ± 1.2               | -          | -                 | 1.3 ± 1.8          | -          | -                 | -       |
| <b>Endocrine-Metabolic Variables</b>      |                         |            |                   |                    |            |                   |         |
| Testosterone (nmol/ L)                    | 1.3 ± 0.5               | 0.9 ± 0.5  | -0.4 ± 0.7        | 1.3 ± 0.4          | 1.0 ± 0.5  | -0.3 ± 0.3        | NS      |
| SHBG (nmol/ L)                            | 34 ± 13                 | 57 ± 26    | 23 ± 21           | 31 ± 14            | 29 ± 13    | -2 ± 9            | 0.0003  |
| FAI                                       | 4.7 ± 2.4               | 2.6 ± 4.6  | -2.1 ± 5.0        | 5.0 ± 2.8          | 3.6 ± 9.2  | -1.4 ± 1.0        | NS      |
| Glucose (mmol/ L)                         | 4.5 ± 0.3               | 4.5 ± 0.5  | 0.0 ± 0.6         | 4.5 ± 0.4          | 4.2 ± 0.3  | -0.3 ± 0.5        | NS      |
| Fasting insulin (pmol/ L)                 | 78 ± 41                 | 91 ± 45    | 13 ± 33           | 69 ± 28            | 49 ± 24    | -20 ± 35          | 0.024   |
| HOMA-IR                                   | 2.3 ± 1.3               | 2.6 ± 1.4  | 0.3 ± 1.1         | 2.0 ± 0.9          | 1.4 ± 0.8  | -0.6 ± 1.1        | 0.035   |
| HDL-cholesterol (nmol/ L)                 | 1.3 ± 0.3               | 1.3 ± 0.3  | 0.0 ± 0.2         | 1.3 ± 0.2          | 1.4 ± 0.2  | 0.1 ± 0.2         | NS      |
| LDL-cholesterol (nmol/ L)                 | 2.3 ± 0.5               | 2.6 ± 0.6  | 0.3 ± 0.4         | 2.0 ± 0.4          | 2.0 ± 0.5  | 0.0 ± 0.4         | NS      |
| Triglycerides (nmol/ L)                   | 0.7 ± 0.2               | 0.7 ± 0.3  | 0.0 ± 0.2         | 0.7 ± 0.2          | 0.7 ± 0.2  | 0.0 ± 0.2         | NS      |
| HMW adiponectin (mg/ L)                   | 5 ± 3                   | 5 ± 6      | 0 ± 5             | 5 ± 3              | 9 ± 6      | 4 ± 6             | 0.045   |
| usCRP (mg/ L)                             | 1.0 ± 1.0               | 2.1 ± 2.0  | 1.1 ± 1.7         | 1.7 ± 2.8          | 1.1 ± 1.0  | -0.6 ± 2.9        | 0.003   |
| <b>Body composition (DXA)</b>             |                         |            |                   |                    |            |                   |         |
| Bone mineral density (g/cm <sup>2</sup> ) | 1.19 ± 0.1              | 1.19 ± 0.1 | 0.00 ± 0.03       | 1.21 ± 0.1         | 1.20 ± 0.1 | -0.01 ± 0.05      | NS      |
| Lean mass (kg)                            | 37 ± 6                  | 38 ± 7     | 1 ± 2             | 36 ± 5             | 36 ± 4     | 0 ± 2             | NS      |
| Fat mass (kg)                             | 24 ± 8                  | 26 ± 9     | 2 ± 2             | 25 ± 10            | 25 ± 9     | 0 ± 5             | NS      |
| Abdominal fat (kg)                        | 6.2 ± 2.2               | 6.7 ± 2.4  | 0.5 ± 0.8         | 6.5 ± 2.3          | 6.2 ± 2.4  | -0.3 ± 1.2        | 0.016   |
| <b>Abdominal fat partitioning (MRI)</b>   |                         |            |                   |                    |            |                   |         |
| Subcutaneous fat (cm <sup>2</sup> )       | 192 ± 112               | 217 ± 119  | 25 ± 33           | 188 ± 135          | 183 ± 127  | -5 ± 77           | 0.022   |
| Visceral fat (cm <sup>2</sup> )           | 41 ± 19                 | 45 ± 26    | 4 ± 17            | 40 ± 17            | 38 ± 17    | -2 ± 9            | NS      |
| Hepatic fat (%)                           | 17 ± 7                  | 19 ± 4     | 2 ± 7             | 20 ± 5             | 10 ± 4     | -10 ± 4           | 0.00003 |
| Central (hepato-visceral) fat             | 58 ± 23                 | 64 ± 28    | 6 ± 18            | 60 ± 17            | 48 ± 19    | -12 ± 10          | 0.0051  |

Values are mean ± standard deviation.

BMI, body mass index; SHBG, sex hormone-binding globulin; FAI, free androgen index; HOMA-IR, homeostasis model assessment insulin resistance; HDL, high-density lipoprotein; LDL, low-density lipoprotein; HMW, high molecular weight; usCRP, ultra-sensitive C-reactive protein; DXA, dual X-ray absorptiometry; MRI, magnetic resonance imaging. NS: not significant

<sup>†</sup> OC: Ethinylestradiol 20 µg plus Levonorgestrel 100 mg

<sup>‡</sup> Not significant differences between randomized subgroups at start.

P values are adjusted for age and BMI.
