# Supplementary material for: Reduced circulating levels of chemokine CXCL14 in adolescent girls with polycystic ovary syndrome: normalization after insulin sensitization
Source: PubMed Central journal article supplement — BMJ Open Diabetes Res Care. 2020 Feb 26;8(1):e001035. doi: 10.1136/bmjdrc-2019-001035 (PMC7206903; doi:10.1136/bmjdrc-2019-001035), 2020-02-26
Supplement: bmjdrc-2019-001035supp005.pdf [file bmjdrc-2019-001035supp005.pdf]

**Supplemental Table 4.** Correlations between 0-1 year changes ( $\Delta$ ) in serum CXCL14 levels and those in clinical, endocrine-metabolic, body composition, and abdominal fat partitioning variables in girls with Polycystic Ovary Syndrome (PCOS, N=15) who received a low-dose combination of Spironolactone (50 mg/d), Pioglitazone (7.5 mg/d) and Metformin (850 mg/d) (SPIOMET) for 1 year.

| SPIOMET (N= 15)                                     |                          |              |
|-----------------------------------------------------|--------------------------|--------------|
|                                                     | $\Delta$ CXCL14 (ng/ mL) |              |
|                                                     | R                        | P            |
| <b>Auxology</b>                                     |                          |              |
| $\Delta$ BMI (kg/m <sup>2</sup> )                   | -0.108                   | 0.702        |
| $\Delta$ BMI Z-score                                | -0.108                   | 0.703        |
| <b>Endocrine-Metabolic variables</b>                |                          |              |
| $\Delta$ Testosterone (nmol/ L)                     | 0.293                    | 0.331        |
| $\Delta$ SHBG (nmol/ L)                             | -0.144                   | 0.608        |
| $\Delta$ FAI                                        | 0.017                    | 0.955        |
| $\Delta$ Glucose (mmol/ L)                          | 0.511                    | 0.051        |
| $\Delta$ Fasting insulin (pmol/ L)                  | <b>0.588</b>             | <b>0.021</b> |
| $\Delta$ HOMA-IR                                    | <b>0.630</b>             | <b>0.012</b> |
| $\Delta$ HDL-cholesterol (nmol/ L)                  | -0.198                   | 0.498        |
| $\Delta$ LDL-cholesterol (nmol/ L)                  | -0.446                   | 0.096        |
| $\Delta$ Triglycerides (nmol/ L)                    | -0.045                   | 0.874        |
| $\Delta$ HMW adiponectin (mg/ L)                    | 0.037                    | 0.903        |
| $\Delta$ usCRP (mg/ L)                              | -0.009                   | 0.980        |
| <b>Body composition (DXA)</b>                       |                          |              |
| $\Delta$ Bone mineral density (g/ cm <sup>2</sup> ) | -0.205                   | 0.463        |
| $\Delta$ Lean mass (kg)                             | -0.176                   | 0.531        |
| $\Delta$ Fat mass (kg)                              | -0.036                   | 0.900        |
| $\Delta$ Abdominal fat (kg)                         | -0.243                   | 0.384        |
| <b>Abdominal fat partitioning (MRI)</b>             |                          |              |
| $\Delta$ Subcutaneous fat (cm <sup>2</sup> )        | -0.111                   | 0.693        |
| $\Delta$ Visceral fat (cm <sup>2</sup> )            | -0.187                   | 0.504        |
| $\Delta$ Hepatic fat (%)                            | 0.226                    | 0.417        |
| $\Delta$ Central (hepato-visceral) fat              | -0.083                   | 0.769        |

CXCL14, C-X-C motif chemokine ligand-14, BMI, body mass index; SHBG, sex hormone-binding globulin; FAI, free androgen index; HOMA-IR, homeostasis model assessment insulin resistance; HDL, high-density lipoprotein; LDL, low-density lipoprotein; HMW, high molecular weight; usCRP, ultra-sensitive C-reactive protein; DXA, dual X-ray absorptiometry; MRI, magnetic resonance imaging.

Results are Pearson correlation coefficients and P values.
