# Supplementary figures and images for: Reduced circulating levels of chemokine CXCL14 in adolescent girls with polycystic ovary syndrome: normalization after insulin sensitization
Source: PubMed Central journal article supplement — BMJ Open Diabetes Res Care. 2020 Feb 26;8(1):e001035. doi: 10.1136/bmjdrc-2019-001035 (PMC7206903; doi:10.1136/bmjdrc-2019-001035), 2020-02-26

## Supplemental Figure 1

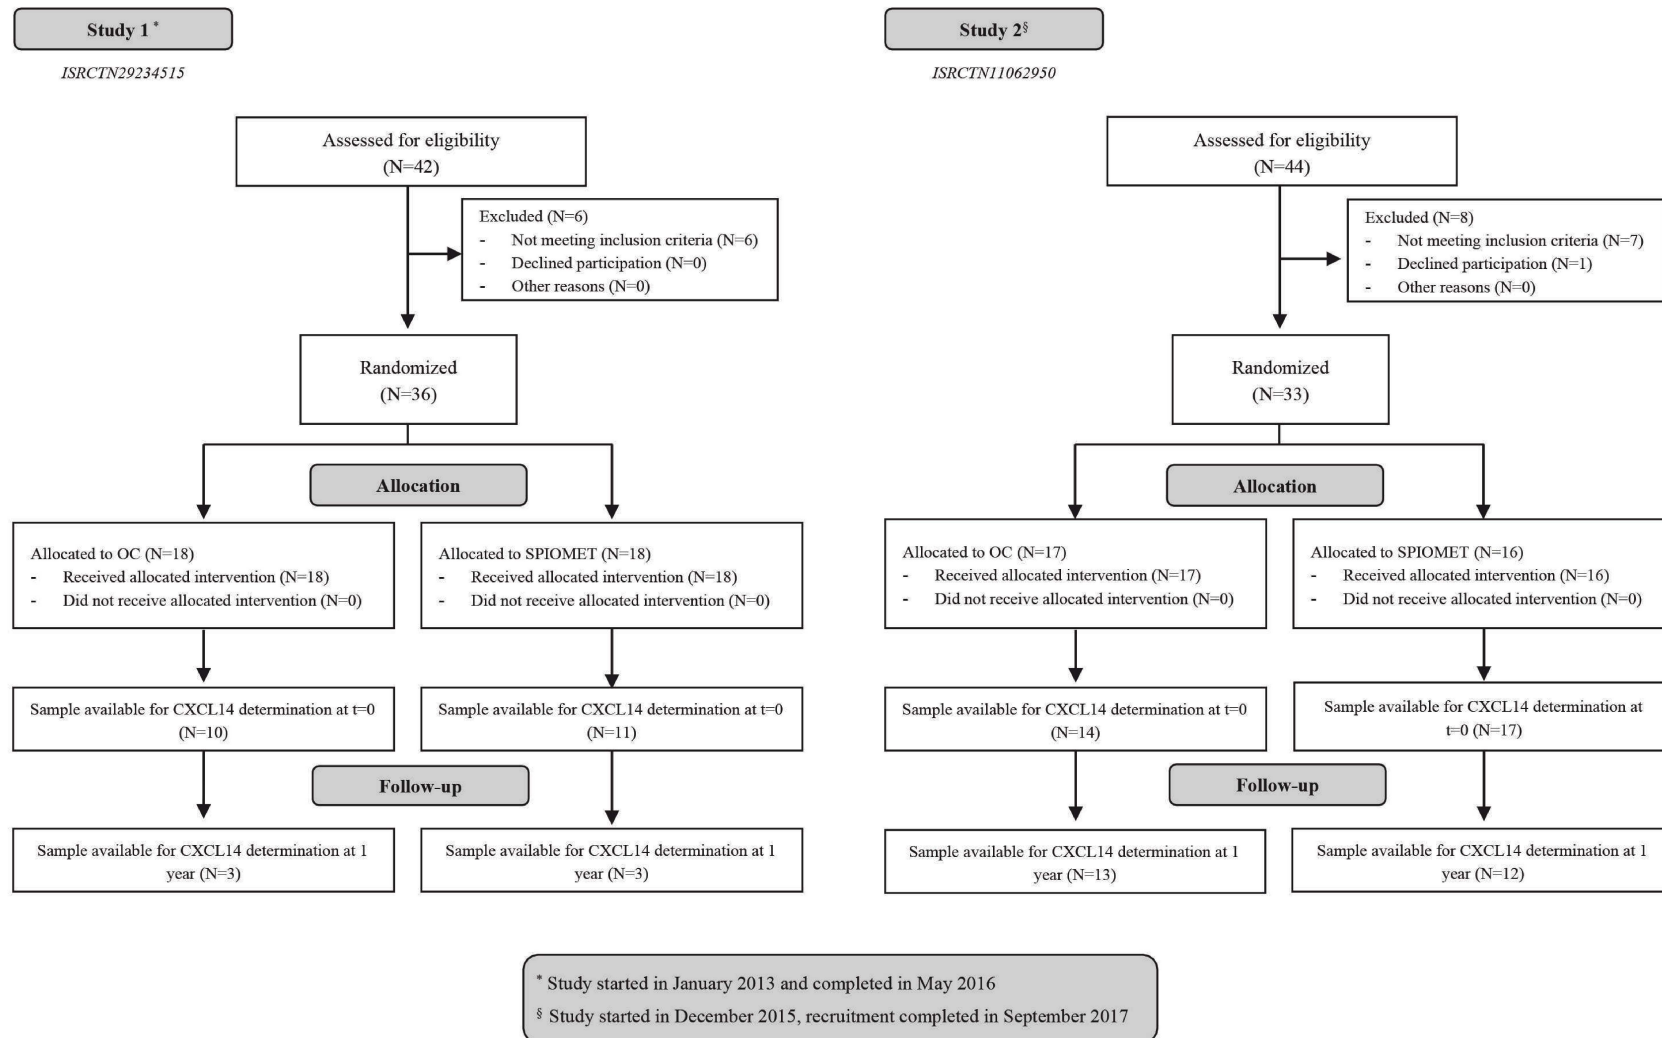

Supplement: bmjdrc-2019-001035supp001.pdf [file bmjdrc-2019-001035supp001.pdf]
